# Supplementary material for: Identifying and aggregating high-quality pathogen data: a new approach for potable reuse regulatory development
Source: Royal Society of Chemistry journal article supplement (doi:10.1039/d3ew00131h), 2023-01-01
Supplement: d3ew00131h1.pdf [file d3ew00131h1.pdf]

| Aggregated <i>Cryptosporidium</i> Dataset |                                                          |                       | Aggregated <i>Giardia</i> Dataset |                                                        |                       | Aggregated Culturable Enterovirus Dataset |                                                                   |                       |
|-------------------------------------------|----------------------------------------------------------|-----------------------|-----------------------------------|--------------------------------------------------------|-----------------------|-------------------------------------------|-------------------------------------------------------------------|-----------------------|
| Study                                     | log10 recovery-corrected concentration (log10 oocysts/L) | Measured or simulated | Study                             | log10 recovery-corrected concentration (log10 cysts/L) | Measured or simulated | Study                                     | log10 recovery-corrected concentration (log10 infectious units/L) | Measured or simulated |
| Monterey 2013                             | -0.1                                                     | Simulated             | Pecson 2022                       | 3.1                                                    | Measured              | Pecson 2022                               | 0.6                                                               | Simulated             |
| Monterey 2013                             | 0.2                                                      | Simulated             | Pecson 2022                       | 3.1                                                    | Measured              | Pecson 2022                               | 1.0                                                               | Simulated             |
| Melbourne Water and Tetra Tech 2011       | 0.4                                                      | Simulated             | Pecson 2022                       | 3.3                                                    | Measured              | Pecson 2022                               | 1.2                                                               | Simulated             |
| Monterey 2013                             | 0.5                                                      | Simulated             | Pecson 2022                       | 3.3                                                    | Measured              | Pecson 2022                               | 1.3                                                               | Simulated             |
| Pecson 2022                               | 0.5                                                      | Measured              | Oceanside 2015                    | 3.3                                                    | Measured              | Pecson 2022                               | 1.4                                                               | Simulated             |
| Pecson 2022                               | 0.5                                                      | Measured              | Pecson 2022                       | 3.3                                                    | Measured              | Pecson 2022                               | 1.5                                                               | Simulated             |
| Pecson 2022                               | 0.6                                                      | Simulated             | Pecson 2022                       | 3.3                                                    | Measured              | Pecson 2022                               | 1.6                                                               | Simulated             |
| Monterey 2013                             | 0.6                                                      | Measured              | Pecson 2022                       | 3.3                                                    | Measured              | Pecson 2022                               | 1.7                                                               | Simulated             |
| Melbourne Water and Tetra Tech 2011       | 0.7                                                      | Simulated             | Pecson 2022                       | 3.4                                                    | Measured              | Pecson 2022                               | 1.7                                                               | Simulated             |
| Pecson 2022                               | 0.8                                                      | Simulated             | Pecson 2022                       | 3.4                                                    | Measured              | Pecson 2022                               | 1.8                                                               | Measured              |
| San Diego 2019                            | 0.8                                                      | Measured              | Pecson 2022                       | 3.4                                                    | Measured              | Pecson 2022                               | 1.8                                                               | Simulated             |
| Melbourne Water and Tetra Tech 2011       | 0.8                                                      | Simulated             | Pecson 2022                       | 3.4                                                    | Measured              | Pecson 2022                               | 1.8                                                               | Simulated             |
| Pecson 2022                               | 0.9                                                      | Measured              | Pecson 2022                       | 3.4                                                    | Measured              | Pecson 2022                               | 1.9                                                               | Simulated             |
| Pecson 2022                               | 0.9                                                      | Measured              | Pecson 2022                       | 3.4                                                    | Measured              | Pecson 2022                               | 1.9                                                               | Measured              |
| Melbourne Water and Tetra Tech 2011       | 0.9                                                      | Simulated             | San Diego 2019                    | 3.4                                                    | Measured              | Pecson 2022                               | 1.9                                                               | Measured              |
| Monterey 2013                             | 0.9                                                      | Measured              | Pecson 2022                       | 3.5                                                    | Measured              | Pecson 2022                               | 1.9                                                               | Simulated             |
| Pecson 2022                               | 1.0                                                      | Measured              | Pecson 2022                       | 3.5                                                    | Measured              | Pecson 2022                               | 2.0                                                               | Simulated             |
| Pecson 2022                               | 1.0                                                      | Measured              | Pecson 2022                       | 3.5                                                    | Measured              | Pecson 2022                               | 2.0                                                               | Simulated             |
| Pecson 2022                               | 1.0                                                      | Measured              | Pecson 2022                       | 3.5                                                    | Measured              | Pecson 2022                               | 2.0                                                               | Measured              |
| Melbourne Water and Tetra Tech 2011       | 1.0                                                      | Simulated             | Pecson 2022                       | 3.5                                                    | Measured              | Pecson 2022                               | 2.1                                                               | Measured              |
| Pecson 2022                               | 1.0                                                      | Measured              | Pecson 2022                       | 3.5                                                    | Measured              | Pecson 2022                               | 2.2                                                               | Measured              |
| Pecson 2022                               | 1.0                                                      | Measured              | San Diego 2019                    | 3.5                                                    | Measured              | Pecson 2022                               | 2.3                                                               | Measured              |
| Melbourne Water and Tetra Tech 2011       | 1.1                                                      | Simulated             | Pecson 2022                       | 3.5                                                    | Measured              | Pecson 2022                               | 2.3                                                               | Measured              |
| Pecson 2022                               | 1.1                                                      | Measured              | Kitajima 2014                     | 3.5                                                    | Measured              | Pecson 2022                               | 2.3                                                               | Measured              |
| Pecson 2022                               | 1.1                                                      | Measured              | Kitajima 2014                     | 3.5                                                    | Measured              | Pecson 2022                               | 2.4                                                               | Measured              |
| Melbourne Water and Tetra Tech 2011       | 1.1                                                      | Simulated             | Pecson 2022                       | 3.5                                                    | Measured              | Pecson 2022                               | 2.4                                                               | Measured              |
| San Diego 2019                            | 1.2                                                      | Measured              | Pecson 2022                       | 3.5                                                    | Measured              | Pecson 2022                               | 2.4                                                               | Measured              |
| Pecson 2022                               | 1.2                                                      | Measured              | Pecson 2022                       | 3.5                                                    | Measured              | Pecson 2022                               | 2.4                                                               | Measured              |
| San Diego 2019                            | 1.2                                                      | Measured              | Pecson 2022                       | 3.5                                                    | Measured              | Pecson 2022                               | 2.4                                                               | Measured              |
| Pecson 2022                               | 1.2                                                      | Measured              | Pecson 2022                       | 3.6                                                    | Measured              | Pecson 2022                               | 2.5                                                               | Measured              |
| Pecson 2022                               | 1.2                                                      | Measured              | Pecson 2022                       | 3.6                                                    | Measured              | Pecson 2022                               | 2.5                                                               | Measured              |
| Melbourne Water and Tetra Tech 2011       | 1.2                                                      | Simulated             | San Diego 2019                    | 3.6                                                    | Measured              | Pecson 2022                               | 2.6                                                               | Measured              |
| San Diego 2019                            | 1.2                                                      | Measured              | Pecson 2022                       | 3.6                                                    | Measured              | Pecson 2022                               | 2.6                                                               | Measured              |
| Pecson 2022                               | 1.2                                                      | Measured              | Pecson 2022                       | 3.6                                                    | Measured              | Pecson 2022                               | 2.7                                                               | Measured              |
| Melbourne Water and Tetra Tech 2011       | 1.2                                                      | Simulated             | San Diego 2019                    | 3.6                                                    | Measured              | Pecson 2022                               | 2.7                                                               | Measured              |
| Pecson 2022                               | 1.3                                                      | Measured              | Pecson 2022                       | 3.6                                                    | Measured              | Pecson 2022                               | 2.7                                                               | Measured              |
| Melbourne Water and Tetra Tech 2011       | 1.3                                                      | Simulated             | Oceanside 2015                    | 3.6                                                    | Measured              | Pecson 2022                               | 2.7                                                               | Measured              |
| Pecson 2022                               | 1.3                                                      | Measured              | Pecson 2022                       | 3.6                                                    | Measured              | Pecson 2022                               | 2.7                                                               | Measured              |
| San Diego 2019                            | 1.3                                                      | Measured              | Pecson 2022                       | 3.6                                                    | Measured              | Pecson 2022                               | 2.7                                                               | Measured              |
| Pecson 2022                               | 1.3                                                      | Measured              | San Diego 2019                    | 3.6                                                    | Measured              | Pecson 2022                               | 2.7                                                               | Measured              |
| Melbourne Water and Tetra Tech 2011       | 1.3                                                      | Simulated             | San Diego 2019                    | 3.6                                                    | Measured              | Pecson 2022                               | 2.8                                                               | Measured              |
| Pecson 2022                               | 1.3                                                      | Measured              | San Diego 2019                    | 3.7                                                    | Measured              | Pecson 2022                               | 2.8                                                               | Measured              |
| Pecson 2022                               | 1.3                                                      | Measured              | Pecson 2022                       | 3.7                                                    | Measured              | Pecson 2022                               | 2.8                                                               | Measured              |
| Melbourne Water and Tetra Tech 2011       | 1.4                                                      | Simulated             | Pecson 2022                       | 3.7                                                    | Measured              | Pecson 2022                               | 2.8                                                               | Measured              |
| Pecson 2022                               | 1.4                                                      | Measured              | Pecson 2022                       | 3.7                                                    | Measured              | Pecson 2022                               | 2.8                                                               | Measured              |
| Pecson 2022                               | 1.4                                                      | Measured              | Pecson 2022                       | 3.7                                                    | Measured              | Pecson 2022                               | 2.9                                                               | Measured              |
| Pecson 2022                               | 1.4                                                      | Measured              | Pecson 2022                       | 3.7                                                    | Measured              | Pecson 2022                               | 2.9                                                               | Measured              |
| Melbourne Water and Tetra Tech 2011       | 1.4                                                      | Simulated             | San Diego 2019                    | 3.7                                                    | Measured              | Pecson 2022                               | 3.0                                                               | Measured              |
| Pecson 2022                               | 1.4                                                      | Measured              | Oceanside 2015                    | 3.7                                                    | Measured              | Pecson 2022                               | 3.0                                                               | Measured              |
| San Diego 2019                            | 1.4                                                      | Measured              | Oceanside 2015                    | 3.7                                                    | Measured              | Pecson 2022                               | 3.0                                                               | Measured              |
| San Diego 2019                            | 1.4                                                      | Measured              | Oceanside 2015                    | 3.7                                                    | Measured              | Pecson 2022                               | 3.0                                                               | Measured              |
| Kitajima 2014                             | 1.4                                                      | Simulated             | Pecson 2022                       | 3.7                                                    | Measured              | Pecson 2022                               | 3.0                                                               | Measured              |
| Pecson 2022                               | 1.4                                                      | Measured              | Kitajima 2014                     | 3.7                                                    | Measured              | Oceanside 2015                            | 3.1                                                               | Measured              |
| Pecson 2022                               | 1.4                                                      | Measured              | Kitajima 2014                     | 3.8                                                    | Measured              | Oceanside 2015                            | 3.1                                                               | Measured              |
| San Diego 2019                            | 1.4                                                      | Measured              | Pecson 2022                       | 3.8                                                    | Measured              | Pecson 2022                               | 3.1                                                               | Measured              |
| San Diego 2019                            | 1.4                                                      | Measured              | San Diego 2019                    | 3.8                                                    | Measured              | Pecson 2022                               | 3.2                                                               | Measured              |
| Melbourne Water and Tetra Tech 2011       | 1.4                                                      | Simulated             | Pecson 2022                       | 3.8                                                    | Measured              | Pecson 2022                               | 3.2                                                               | Measured              |
| Pecson 2022                               | 1.4                                                      | Measured              | San Diego 2019                    | 3.8                                                    | Measured              | Pecson 2022                               | 3.2                                                               | Measured              |
| Pecson 2022                               | 1.4                                                      | Measured              | Kitajima 2014                     | 3.8                                                    | Measured              | Pecson 2022                               | 3.2                                                               | Measured              |
| Pecson 2022                               | 1.4                                                      | Measured              | Pecson 2022                       | 3.8                                                    | Measured              | Pecson 2022                               | 3.2                                                               | Measured              |
| Oceanside 2015                            | 1.5                                                      | Measured              | Kitajima 2014                     | 3.8                                                    | Measured              | Pecson 2022                               | 3.2                                                               | Measured              |
| Oceanside 2015                            | 1.5                                                      | Measured              | Kitajima 2014                     | 3.8                                                    | Measured              | Pecson 2022                               | 3.2                                                               | Measured              |
| Melbourne Water and Tetra Tech 2011       | 1.5                                                      | Simulated             | Pecson 2022                       | 3.8                                                    | Measured              | Pecson 2022                               | 3.3                                                               | Measured              |
| Pecson 2022                               | 1.5                                                      | Measured              | Oceanside 2015                    | 3.8                                                    | Measured              | Pecson 2022                               | 3.3                                                               | Measured              |
| Melbourne Water and Tetra Tech 2011       | 1.5                                                      | Simulated             | Oceanside 2015                    | 3.8                                                    | Measured              | Pecson 2022                               | 3.3                                                               | Measured              |
| Pecson 2022                               | 1.5                                                      | Measured              | Oceanside 2015                    | 3.8                                                    | Measured              | Pecson 2022                               | 3.3                                                               | Measured              |
| Pecson 2022                               | 1.5                                                      | Measured              | Oceanside 2015                    | 3.8                                                    | Measured              | Pecson 2022                               | 3.3                                                               | Measured              |
| Pecson 2022                               | 1.5                                                      | Measured              | Oceanside 2015                    | 3.8                                                    | Measured              | Pecson 2022                               | 3.4                                                               | Measured              |
| Melbourne Water and Tetra Tech 2011       | 1.5                                                      | Simulated             | Oceanside 2015                    | 3.8                                                    | Measured              | Pecson 2022                               | 3.4                                                               | Measured              |
| Pecson 2022                               | 1.5                                                      | Measured              | Monterey 2013                     | 3.9                                                    | Measured              | Pecson 2022                               | 3.4                                                               | Measured              |
| Pecson 2022                               | 1.5                                                      | Measured              | Kitajima 2014                     | 3.9                                                    | Measured              | Pecson 2022                               | 3.4                                                               | Measured              |
| San Diego 2019                            | 1.5                                                      | Measured              | Pecson 2022                       | 3.9                                                    | Measured              | Oceanside 2015                            | 3.4                                                               | Measured              |
| Pecson 2022                               | 1.5                                                      | Measured              | Pecson 2022                       | 3.9                                                    | Measured              | Pecson 2022                               | 3.4                                                               | Measured              |
| Monterey 2013                             | 1.5                                                      | Measured              | Pecson 2022                       | 3.9                                                    | Measured              | Pecson 2022                               | 3.4                                                               | Measured              |
| Pecson 2022                               | 1.5                                                      | Measured              | Pecson 2022                       | 3.9                                                    | Measured              | Pecson 2022                               | 3.4                                                               | Measured              |
| Melbourne Water and Tetra Tech 2011       | 1.5                                                      | Simulated             | Pecson 2022                       | 3.9                                                    | Measured              | Pecson 2022                               | 3.4                                                               | Measured              |
| Kitajima 2014                             | 1.6                                                      | Simulated             | Pecson 2022                       | 3.9                                                    | Measured              | Pecson 2022                               | 3.5                                                               | Measured              |
| Pecson 2022                               | 1.6                                                      | Measured              | Pecson 2022                       | 3.9                                                    | Measured              | Pecson 2022                               | 3.5                                                               | Measured              |
| Pecson 2022                               | 1.6                                                      | Measured              | Pecson 2022                       | 3.9                                                    | Measured              | Pecson 2022                               | 3.5                                                               | Measured              |
| Pecson 2022                               | 1.6                                                      | Measured              | Pecson 2022                       | 3.9                                                    | Measured              | Pecson 2022                               | 3.5                                                               | Measured              |
| Melbourne Water and Tetra Tech 2011       | 1.6                                                      | Simulated             | Oceanside 2015                    | 3.9                                                    | Measured              | Pecson 2022                               | 3.5                                                               | Measured              |
| Pecson 2022                               | 1.6                                                      | Measured              | Oceanside 2015                    | 3.9                                                    | Measured              | Pecson 2022                               | 3.5                                                               | Measured              |
| Pecson 2022                               | 1.6                                                      | Measured              | Oceanside 2015                    | 3.9                                                    | Measured              | Pecson 2022                               | 3.6                                                               | Measured              |
| Pecson 2022                               | 1.6                                                      | Measured              | Pecson 2022                       | 3.9                                                    | Measured              | Pecson 2022                               | 3.6                                                               | Measured              |
| San Diego 2019                            | 1.6                                                      | Measured              | Pecson 2022                       | 3.9                                                    | Measured              | Pecson 2022                               | 3.6                                                               | Measured              |
| Pecson 2022                               | 1.6                                                      | Measured              | San Diego 2019                    | 3.9                                                    | Measured              | Pecson 2022                               | 3.6                                                               | Measured              |





|                                     |     |          |
|-------------------------------------|-----|----------|
| Melbourne Water and Tetra Tech 2011 | 2.7 | Measured |
| Pecson 2022                         | 2.8 | Measured |
| Melbourne Water and Tetra Tech 2011 | 2.8 | Measured |
| Melbourne Water and Tetra Tech 2011 | 2.9 | Measured |
| Kitajima 2014                       | 3.0 | Measured |
| Melbourne Water and Tetra Tech 2011 | 3.0 | Measured |
| Melbourne Water and Tetra Tech 2011 | 3.0 | Measured |
| Melbourne Water and Tetra Tech 2011 | 3.0 | Measured |
| Melbourne Water and Tetra Tech 2011 | 3.0 | Measured |
| Melbourne Water and Tetra Tech 2011 | 3.0 | Measured |
| Melbourne Water and Tetra Tech 2011 | 3.1 | Measured |
| Melbourne Water and Tetra Tech 2011 | 3.1 | Measured |
| Melbourne Water and Tetra Tech 2011 | 3.2 | Measured |
| Melbourne Water and Tetra Tech 2011 | 3.5 | Measured |
| Melbourne Water and Tetra Tech 2011 | 3.5 | Measured |
| Melbourne Water and Tetra Tech 2011 | 3.6 | Measured |
| Melbourne Water and Tetra Tech 2011 | 3.6 | Measured |
| Melbourne Water and Tetra Tech 2011 | 3.6 | Measured |
| Melbourne Water and Tetra Tech 2011 | 3.8 | Measured |
| Melbourne Water and Tetra Tech 2011 | 3.9 | Measured |
